# Supplementary material for: Plant derived porous graphene nanosheets for efficient CO2capture
Source: Royal Society of Chemistry journal article supplement (doi:10.1039/c4ra05522e), 2014-09-08
Supplement: c4ra05522e1.pdf [file c4ra05522e1.pdf]

# Plant derived porous graphene nanosheets with efficient CO<sub>2</sub> capture

Ganesh K. Parshetti, Shamik Chowdhury, Rajasekhar Balasubramanian\*

*Department of Civil and Environmental Engineering, National University of  
Singapore, 1 Engineering Drive 2, Singapore 117576, Republic of Singapore*

---

\* Corresponding author. Phone: +65 65165135; fax: +65 67744202;  
email: ceerbala@nus.edu.sg

## **SUPPORTING INFORMATION**

(Figures S1-S5)

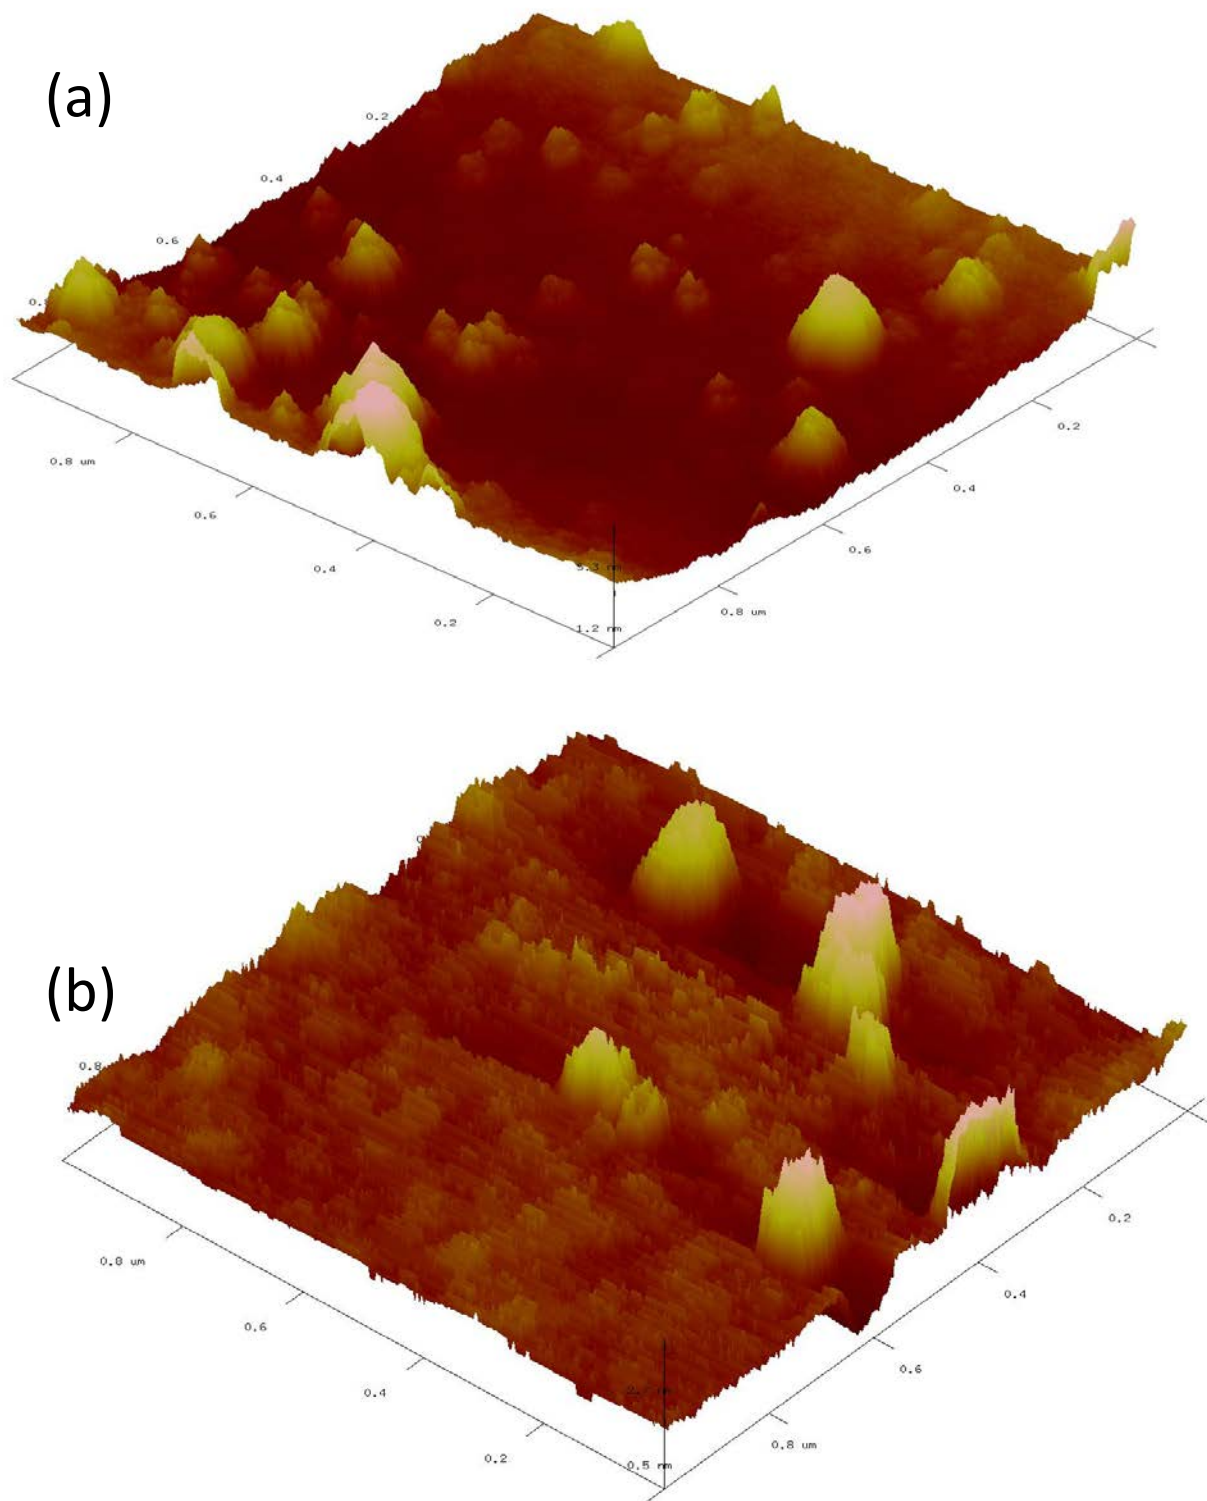

**Figure S1.** 3-D representation of a  $1\ \mu\text{m} \times 1\ \mu\text{m}$  AFM scan of (a) EFBG-800 and (b) EFBG-1000 material overlaid on the Si surface.

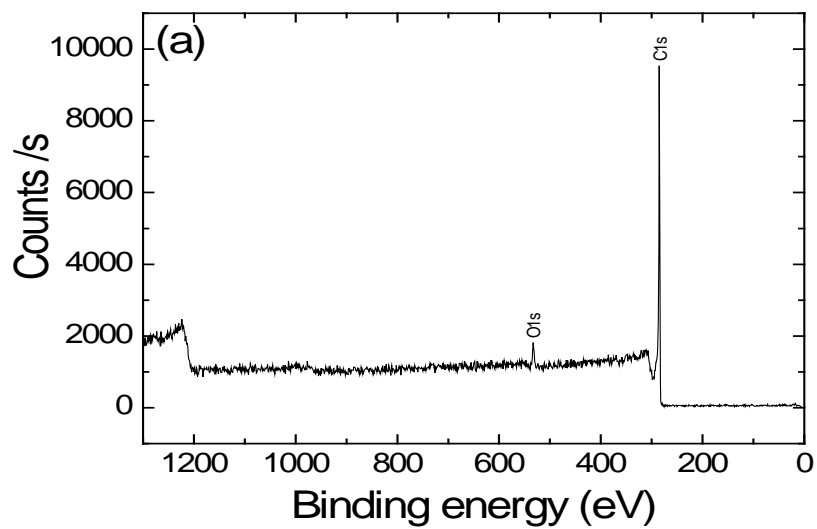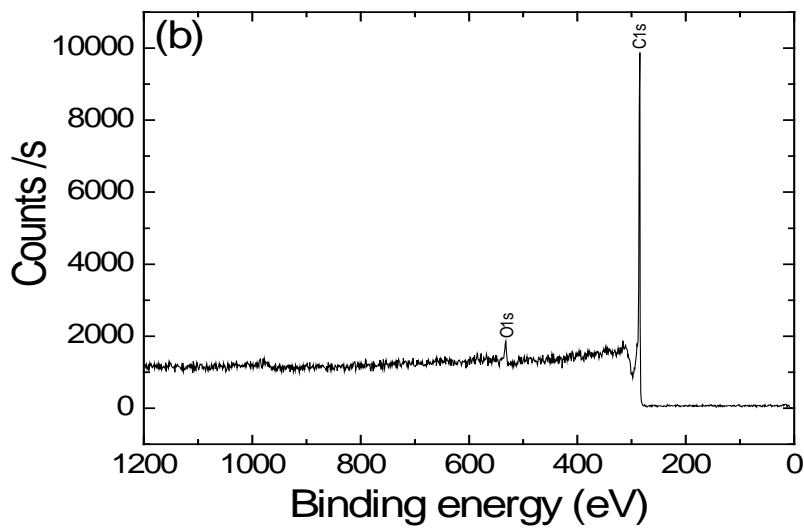

**Figure S2.** XPS survey spectra of (a) EFBG-800 and (b) EFBG-1000.

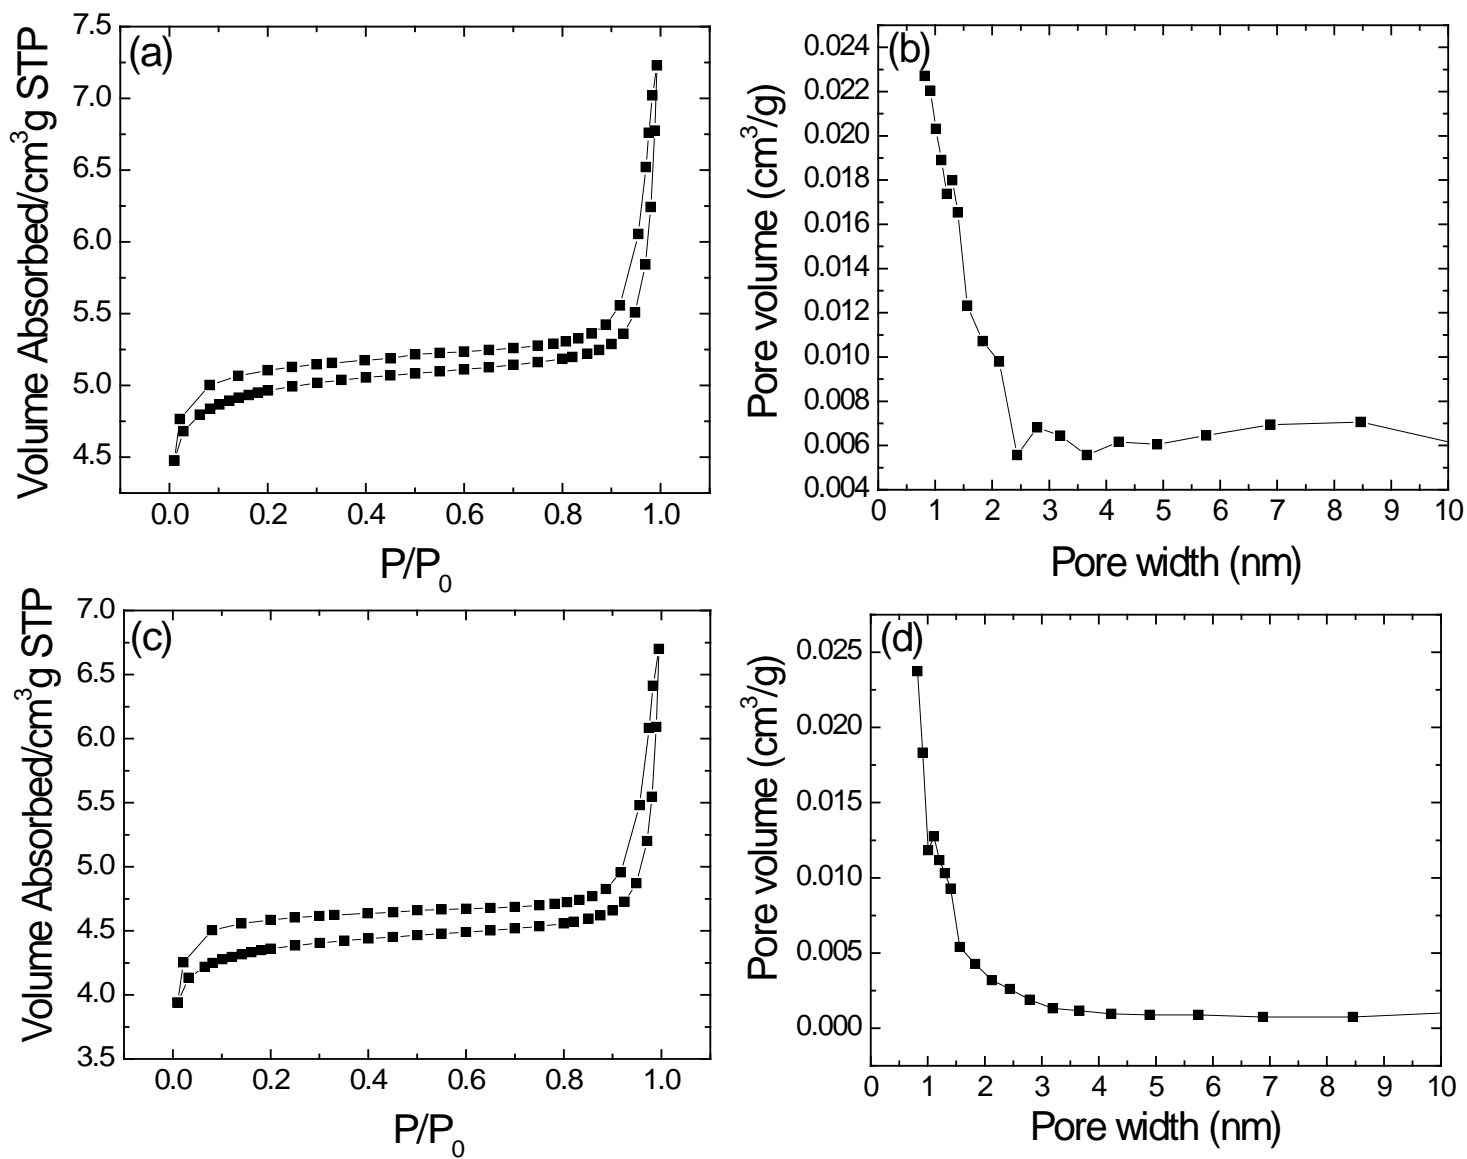

**Figure S3.** (a) N<sub>2</sub> adsorption-desorption isotherms of EFBG-800 at 77 K. (b) Pore size distribution (PSD) of EFBG-800. (c) N<sub>2</sub> adsorption-desorption isotherms of EFBG-1000 at 77 K. (d) Pore size distribution (PSD) of EFBG-1000.

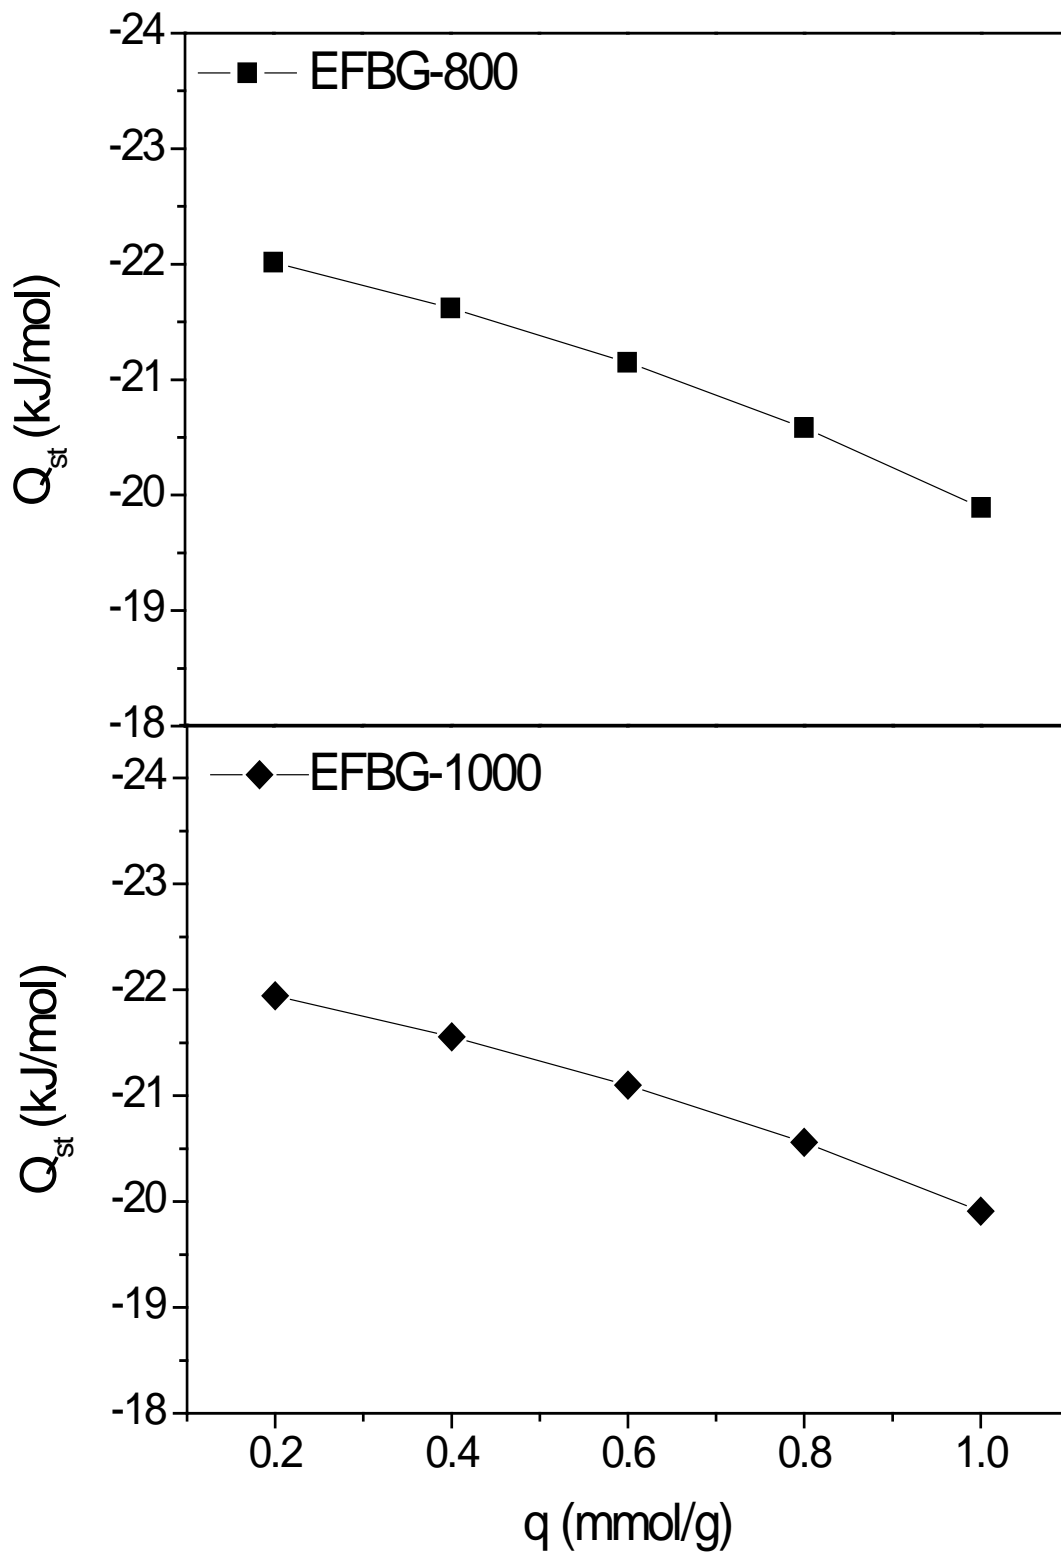

**Figure S4.** Variation of the isosteric heat of adsorption with the amount of CO<sub>2</sub> adsorbed.

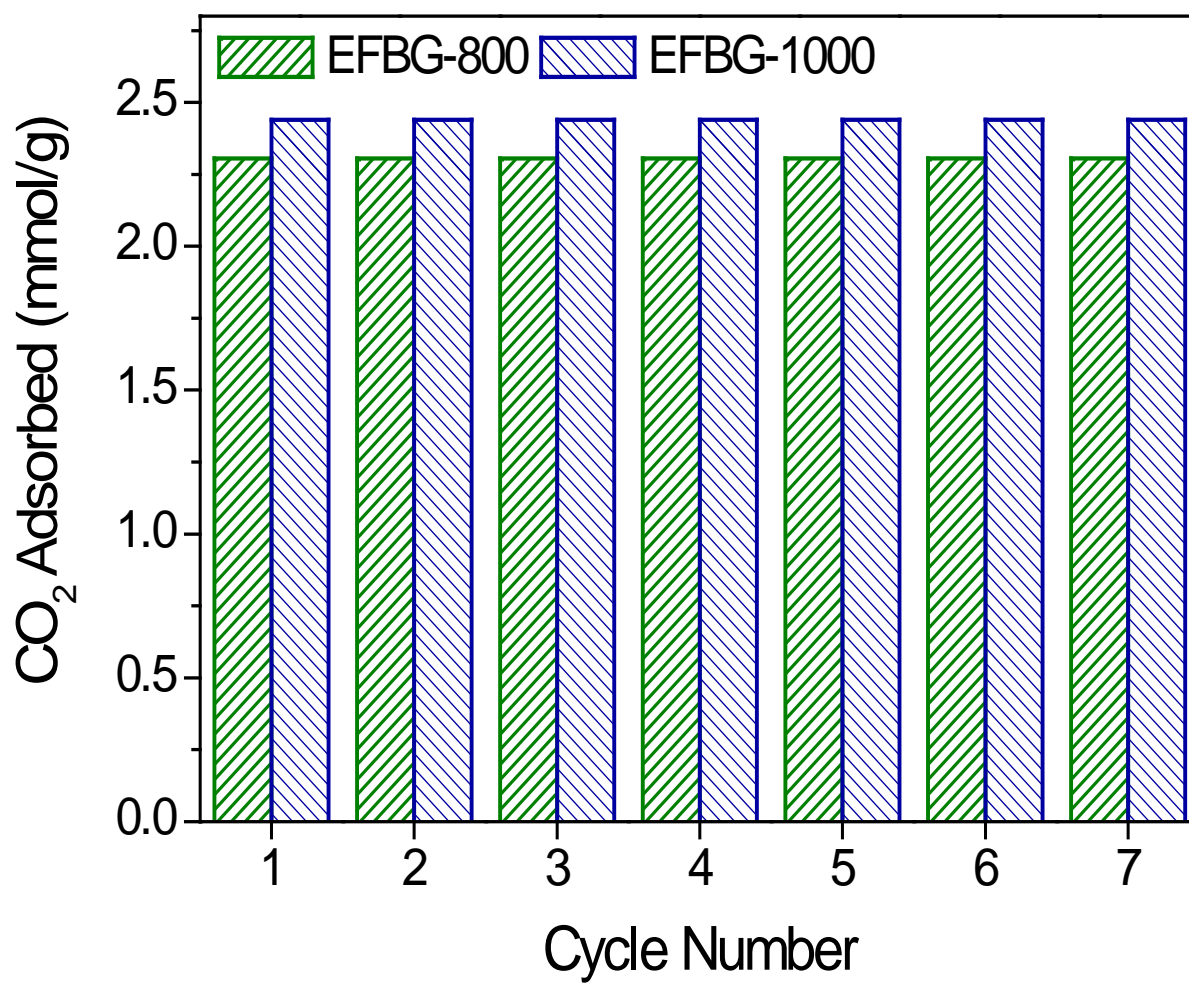

**Figure S5.** CO<sub>2</sub> adsorption cycles for EFBG-800 and EFBG-1000 at 25 °C.
